# Supplementary material
Source: PubMed Central journal article supplement (PMC4339666)
Supplement: NIHMS624645-supplement-supplement_1.pdf [file NIHMS624645-supplement-supplement_1.pdf]

Supplemental Table 1. Partial correlation coefficients among sex steroid hormone measures and SHBG in BEEDS control subjects, adjusted for age and BMI (n=212)

|                 | DHEA        | DHEAS        | Androstenediol | Androstenedione | T           | DHT         | 3adiol3g     | 3adiol17g   | ADT         | ADT-G       | E1          | E1S          | E2          | SHBG         | Free T      | Free DHT    | Free E2 |
|-----------------|-------------|--------------|----------------|-----------------|-------------|-------------|--------------|-------------|-------------|-------------|-------------|--------------|-------------|--------------|-------------|-------------|---------|
| DHEA            |             |              |                |                 |             |             |              |             |             |             |             |              |             |              |             |             |         |
| DHEAS           | <b>0.45</b> |              |                |                 |             |             |              |             |             |             |             |              |             |              |             |             |         |
| Androstenediol  | <b>0.40</b> | 0.11         |                |                 |             |             |              |             |             |             |             |              |             |              |             |             |         |
| Androstenedione | <b>0.47</b> | 0.10         | <b>0.31</b>    |                 |             |             |              |             |             |             |             |              |             |              |             |             |         |
| T               | <b>0.15</b> | <b>-0.16</b> | <b>0.55</b>    | <b>0.46</b>     |             |             |              |             |             |             |             |              |             |              |             |             |         |
| DHT             | <b>0.15</b> | <b>-0.10</b> | <b>0.37</b>    | <b>0.22</b>     | <b>0.63</b> |             |              |             |             |             |             |              |             |              |             |             |         |
| 3adiol3g        | 0.10        | <b>0.21</b>  | 0.01           | 0.04            | -0.04       | -0.08       |              |             |             |             |             |              |             |              |             |             |         |
| 3adiol17g       | 0.08        | 0.06         | 0.07           | 0.07            | 0.11        | 0.13        | <b>0.60</b>  |             |             |             |             |              |             |              |             |             |         |
| ADT             | <b>0.55</b> | <b>0.38</b>  | <b>0.34</b>    | <b>0.43</b>     | <b>0.15</b> | <b>0.33</b> | 0.12         | 0.08        |             |             |             |              |             |              |             |             |         |
| ADT-G           | <b>0.28</b> | <b>0.28</b>  | 0.09           | <b>0.14</b>     | 0.04        | 0.09        | <b>0.71</b>  | <b>0.44</b> | <b>0.22</b> |             |             |              |             |              |             |             |         |
| E1              | <b>0.26</b> | <b>0.27</b>  | <b>0.25</b>    | <b>0.43</b>     | <b>0.20</b> | <b>0.16</b> | <b>0.15</b>  | <b>0.24</b> | <b>0.41</b> | 0.10        |             |              |             |              |             |             |         |
| E1S             | 0.12        | <b>0.42</b>  | 0.02           | 0.03            | -0.04       | -0.08       | <b>0.30</b>  | <b>0.27</b> | 0.16        | <b>0.15</b> | <b>0.54</b> |              |             |              |             |             |         |
| E2              | <b>0.17</b> | 0.07         | <b>0.39</b>    | <b>0.41</b>     | <b>0.51</b> | <b>0.38</b> | 0.03         | <b>0.22</b> | <b>0.30</b> | 0.00        | <b>0.74</b> | <b>0.35</b>  |             |              |             |             |         |
| SHBG            | 0.09        | <b>-0.18</b> | <b>0.32</b>    | <b>0.18</b>     | <b>0.60</b> | <b>0.59</b> | <b>-0.18</b> | 0.01        | 0.00        | -0.02       | 0.00        | <b>-0.26</b> | <b>0.23</b> |              |             |             |         |
| Free T          | 0.13        | -0.08        | <b>0.42</b>    | <b>0.45</b>     | <b>0.75</b> | <b>0.28</b> | -0.18        | 0.14        | <b>0.20</b> | 0.08        | <b>0.26</b> | <b>0.17</b>  | <b>0.48</b> | -0.02        |             |             |         |
| Free DHT        | <b>0.21</b> | -0.01        | <b>0.33</b>    | <b>0.28</b>     | <b>0.51</b> | <b>0.74</b> | 0.08         | <b>0.20</b> | <b>0.44</b> | <b>0.19</b> | <b>0.27</b> | 0.12         | <b>0.43</b> | 0.04         | <b>0.63</b> |             |         |
| Free E2         | <b>0.15</b> | <b>0.15</b>  | <b>0.28</b>    | <b>0.34</b>     | <b>0.28</b> | <b>0.14</b> | 0.09         | <b>0.22</b> | <b>0.32</b> | 0.01        | <b>0.75</b> | <b>0.47</b>  | <b>0.92</b> | <b>-0.14</b> | <b>0.50</b> | <b>0.42</b> |         |

Bolded correlation coefficients are significant at the 0.05 level. Abbreviations: E1, estrone; E2, estradiol; T, testosterone.

**Supplemental Table 2. Multivariable analysis of the associations between sex steroid hormones, SHBG and Barrett's esophagus stratified by age**

| Variable                               | Age<50.60 |       |      |              |             | Age ≥50.60 |       |      |              |             |
|----------------------------------------|-----------|-------|------|--------------|-------------|------------|-------|------|--------------|-------------|
|                                        | Controls  | Cases | OR   | 95% CI       | p value     | Controls   | Cases | OR   |              | p value     |
| <b>DHEA (nmol/L)</b>                   |           |       |      |              |             |            |       |      |              |             |
| <5.90                                  | 12        | 8     |      |              |             | 40         | 62    |      |              |             |
| 5.90-<9.20                             | 13        | 9     | 0.37 | (0.08 ,1.80) | 0.22        | 32         | 39    | 0.76 | (0.38 ,1.51) | 0.43        |
| 9.20-<11.85                            | 29        | 7     | 0.33 | (0.07 ,1.69) | 0.18        | 18         | 11    | 0.36 | (0.14 ,0.94) | <b>0.04</b> |
| >11.85                                 | 36        | 9     | 0.27 | (0.06 ,1.27) | 0.10        | 11         | 14    | 0.57 | (0.21 ,1.57) | 0.28        |
| <i>p value for effect modification</i> |           |       |      |              | 0.66        |            |       |      |              |             |
| continuous                             | 90        | 33    | 0.44 | (0.19 ,0.98) | <b>0.05</b> | 101        | 126   | 0.54 | (0.30 ,0.99) | <b>0.05</b> |
| <i>p value for effect modification</i> |           |       |      |              | 0.55        |            |       |      |              |             |
| <b>DHEAS (umol/L)</b>                  |           |       |      |              |             |            |       |      |              |             |
| <2.25                                  | 12        | 9     |      |              |             | 35         | 58    |      |              |             |
| 2.25-<3.32                             | 14        | 4     | 0.30 | (0.05 ,1.89) | 0.20        | 32         | 28    | 0.50 | (0.23 ,1.09) | 0.08        |
| 3.32-<4.72                             | 22        | 10    | 0.58 | (0.14 ,2.43) | 0.46        | 19         | 13    | 0.31 | (0.12 ,0.82) | <b>0.02</b> |
| >4.72                                  | 37        | 8     | 0.32 | (0.07 ,1.37) | 0.12        | 6          | 13    | 1.50 | (0.43 ,5.23) | 0.52        |
| <i>p value for effect modification</i> |           |       |      |              | 0.08        |            |       |      |              |             |
| continuous                             | 85        | 31    | 0.69 | (0.30 ,1.58) | 0.38        | 92         | 112   | 0.75 | (0.38 ,1.48) | 0.41        |
| <i>p value for effect modification</i> |           |       |      |              | 0.56        |            |       |      |              |             |
| <b>Androstenediol (pmol/L)</b>         |           |       |      |              |             |            |       |      |              |             |
| <1715.26                               | 12        | 5     |      |              |             | 38         | 48    |      |              |             |
| 1715.26-<2323.60                       | 26        | 10    | 0.90 | (0.17 ,4.76) | 0.90        | 21         | 35    | 1.42 | (0.64 ,3.12) | 0.39        |
| 2323.60-<3162.90                       | 21        | 6     | 0.87 | (0.15 ,4.97) | 0.88        | 28         | 24    | 0.60 | (0.27 ,1.33) | 0.21        |
| >3192.9                                | 31        | 12    | 1.15 | (0.24 ,5.58) | 0.86        | 14         | 17    | 0.92 | (0.35 ,2.39) | 0.86        |
| <i>p value for effect modification</i> |           |       |      |              | 0.99        |            |       |      |              |             |
| continuous                             | 90        | 33    | 0.82 | (0.29 ,2.31) | 0.71        | 101        | 124   | 0.89 | (0.50 ,1.59) | 0.70        |
| <i>p value for effect modification</i> |           |       |      |              | 0.59        |            |       |      |              |             |
| <b>Androstenedione (nmol/L)</b>        |           |       |      |              |             |            |       |      |              |             |
| <2.32                                  | 15        | 8     |      |              |             | 32         | 44    |      |              |             |
| 2.32-<2.83                             | 19        | 9     | 1.08 | (0.22 ,5.29) | 0.93        | 32         | 27    | 0.47 | (0.22 ,1.03) | 0.06        |
| 2.83-<3.87                             | 30        | 11    | 1.18 | (0.29 ,4.82) | 0.82        | 17         | 33    | 0.94 | (0.40 ,2.21) | 0.88        |
| >3.87                                  | 26        | 5     | 0.34 | (0.07 ,1.67) | 0.18        | 20         | 22    | 0.63 | (0.27 ,1.46) | 0.28        |

|                                        |    |    |      |               |      |      |     |      |              |             |  |
|----------------------------------------|----|----|------|---------------|------|------|-----|------|--------------|-------------|--|
| <i>p value for effect modification</i> |    |    |      |               |      | 0.23 |     |      |              |             |  |
| continuous                             | 90 | 33 | 0.46 | (0.16 ,1.32)  | 0.15 | 101  | 126 | 0.95 | (0.55 ,1.66) | 0.87        |  |
| <i>p value for effect modification</i> |    |    |      |               |      | 0.09 |     |      |              |             |  |
| <b>Testosterone (nmol/L)</b>           |    |    |      |               |      |      |     |      |              |             |  |
| <10.72                                 | 16 | 8  |      |               |      | 32   | 26  |      |              |             |  |
| 10.72-<14.14                           | 21 | 4  | 0.30 | (0.05 ,1.76)  | 0.18 | 28   | 40  | 2.26 | (0.98 ,5.22) | 0.06        |  |
| 14.14-<18.31                           | 25 | 7  | 0.85 | (0.18 ,3.98)  | 0.83 | 22   | 35  | 2.93 | (1.18 ,7.29) | <b>0.02</b> |  |
| >18.31                                 | 28 | 14 | 1.31 | (0.31 ,5.55)  | 0.71 | 19   | 24  | 1.82 | (0.70 ,4.73) | 0.22        |  |
| <i>p value for effect modification</i> |    |    |      |               |      | 0.06 |     |      |              |             |  |
| continuous                             | 90 | 33 | 1.21 | (0.38 ,3.82)  | 0.75 | 101  | 125 | 1.13 | (0.53 ,2.41) | 0.75        |  |
| <i>p value for effect modification</i> |    |    |      |               |      | 0.62 |     |      |              |             |  |
| <b>DHT (pmol/L)</b>                    |    |    |      |               |      |      |     |      |              |             |  |
| <767.38                                | 20 | 8  |      |               |      | 28   | 30  |      |              |             |  |
| 767.38-<1107.03                        | 21 | 7  | 1.10 | (0.25 ,4.94)  | 0.90 | 26   | 31  | 1.16 | (0.49 ,2.70) | 0.74        |  |
| 1107.03-<1559.02                       | 20 | 11 | 2.42 | (0.58 ,10.14) | 0.23 | 28   | 40  | 1.44 | (0.61 ,3.42) | 0.40        |  |
| >1559.02                               | 29 | 7  | 0.79 | (0.17 ,3.64)  | 0.76 | 19   | 25  | 1.36 | (0.53 ,3.53) | 0.52        |  |
| <i>p value for effect modification</i> |    |    |      |               |      | 0.62 |     |      |              |             |  |
| continuous                             | 90 | 33 | 1.03 | (0.39 ,2.71)  | 0.96 | 101  | 126 | 1.22 | (0.66 ,2.27) | 0.52        |  |
| <i>p value for effect modification</i> |    |    |      |               |      | 0.33 |     |      |              |             |  |
| <b>3adiol3g (nmol/L)</b>               |    |    |      |               |      |      |     |      |              |             |  |
| <2.42                                  | 16 | 6  |      |               |      | 33   | 41  |      |              |             |  |
| 2.42-<3.31                             | 20 | 7  | 0.75 | (0.15 ,3.82)  | 0.73 | 27   | 20  | 0.68 | (0.29 ,1.57) | 0.36        |  |
| 3.31-<4.96                             | 23 | 9  | 1.11 | (0.23 ,5.29)  | 0.90 | 22   | 34  | 1.04 | (0.46 ,2.34) | 0.92        |  |
| >4.96                                  | 30 | 11 | 0.84 | (0.19 ,3.64)  | 0.82 | 18   | 27  | 1.26 | (0.52 ,3.03) | 0.60        |  |
| <i>p value for effect modification</i> |    |    |      |               |      | 0.78 |     |      |              |             |  |
| continuous                             | 89 | 33 | 0.89 | (0.51 ,1.54)  | 0.67 | 100  | 122 | 1.00 | (0.72 ,1.37) | 0.98        |  |
| <i>p value for effect modification</i> |    |    |      |               |      | 0.48 |     |      |              |             |  |
| <b>3adiol17g (nmol/L)</b>              |    |    |      |               |      |      |     |      |              |             |  |
| <6.00                                  | 14 | 9  |      |               |      | 36   | 35  |      |              |             |  |
| 6.00-<8.65                             | 20 | 4  | 0.53 | (0.09 ,2.94)  | 0.47 | 25   | 26  | 1.44 | (0.62 ,3.32) | 0.39        |  |
| 8.65-<12.36                            | 27 | 11 | 1.06 | (0.27 ,4.08)  | 0.94 | 21   | 34  | 2.28 | (0.99 ,5.21) | 0.05        |  |
| >12.36                                 | 28 | 9  | 0.58 | (0.14 ,2.42)  | 0.45 | 18   | 23  | 1.74 | (0.71 ,4.30) | 0.23        |  |
| <i>p value for effect modification</i> |    |    |      |               |      | 0.25 |     |      |              |             |  |

|                                        |    |    |      |               |      |     |     |      |              |             |
|----------------------------------------|----|----|------|---------------|------|-----|-----|------|--------------|-------------|
| continuous                             | 89 | 33 | 0.80 | (0.41 ,1.55)  | 0.51 | 100 | 118 | 1.01 | (0.70 ,1.44) | 0.96        |
| <i>p value for effect modification</i> |    |    |      |               | 0.82 |     |     |      |              |             |
| <b>ADT (pmol/L)</b>                    |    |    |      |               |      |     |     |      |              |             |
| <617.13                                | 13 | 8  |      |               |      | 37  | 69  |      |              |             |
| 617.13-<803.65                         | 18 | 5  | 0.59 | (0.11 ,3.09)  | 0.53 | 31  | 28  | 0.39 | (0.19 ,0.84) | <b>0.02</b> |
| 803.65-<1031.64                        | 27 | 12 | 1.52 | (0.37 ,6.18)  | 0.56 | 21  | 16  | 0.31 | (0.12 ,0.76) | <b>0.01</b> |
| >1031.64                               | 32 | 8  | 0.79 | (0.18 ,3.41)  | 0.75 | 12  | 13  | 0.40 | (0.15 ,1.12) | 0.08        |
| <i>p value for effect modification</i> |    |    |      |               | 0.61 |     |     |      |              |             |
| continuous                             | 90 | 33 | 0.98 | (0.44 ,2.17)  | 0.95 | 101 | 126 | 0.61 | (0.32 ,1.17) | 0.14        |
| <i>p value for effect modification</i> |    |    |      |               | 0.74 |     |     |      |              |             |
| <b>ADT-G (nmol/L)</b>                  |    |    |      |               |      |     |     |      |              |             |
| <56.45                                 | 11 | 8  |      |               |      | 36  | 46  |      |              |             |
| 56.45-<78.02                           | 19 | 4  | 0.29 | (0.05 ,1.68)  | 0.17 | 29  | 32  | 1.00 | (0.47 ,2.14) | 1.00        |
| 78.02-<118.98                          | 31 | 11 | 0.72 | (0.16 ,3.19)  | 0.67 | 16  | 24  | 1.25 | (0.53 ,2.97) | 0.61        |
| >118.98                                | 27 | 10 | 0.57 | (0.12 ,2.69)  | 0.48 | 19  | 20  | 0.77 | (0.32 ,1.83) | 0.55        |
| <i>p value for effect modification</i> |    |    |      |               | 0.76 |     |     |      |              |             |
| continuous                             | 88 | 33 | 1.04 | (0.60 ,1.80)  | 0.89 | 100 | 122 | 0.82 | (0.54 ,1.26) | 0.37        |
| <i>p value for effect modification</i> |    |    |      |               | 0.71 |     |     |      |              |             |
| <b>E1 (pmol/L)</b>                     |    |    |      |               |      |     |     |      |              |             |
| <97.50                                 | 30 | 9  |      |               |      | 19  | 27  |      |              |             |
| 97.50-<127.97                          | 20 | 10 | 2.56 | (0.66 ,9.95)  | 0.17 | 27  | 38  | 0.91 | (0.38 ,2.17) | 0.83        |
| 127.97-<161.59                         | 23 | 11 | 3.52 | (0.84 ,14.78) | 0.09 | 23  | 36  | 1.27 | (0.52 ,3.10) | 0.60        |
| >161.59                                | 17 | 3  | 0.46 | (0.07 ,3.03)  | 0.42 | 32  | 25  | 0.42 | (0.17 ,1.03) | 0.06        |
| <i>p value for effect modification</i> |    |    |      |               | 0.56 |     |     |      |              |             |
| continuous                             | 90 | 33 | 0.68 | (0.20 ,2.35)  | 0.55 | 101 | 126 | 0.42 | (0.21 ,0.84) | <b>0.01</b> |
| <i>p value for effect modification</i> |    |    |      |               | 0.48 |     |     |      |              |             |
| <b>E1S (nmol/L)</b>                    |    |    |      |               |      |     |     |      |              |             |
| <0.92                                  | 26 | 12 |      |               |      | 19  | 42  |      |              |             |
| 0.92-<1.49                             | 16 | 8  | 1.07 | (0.23 ,4.96)  | 0.93 | 27  | 25  | 0.42 | (0.17 ,1.03) | 0.06        |
| 1.49-<2.17                             | 23 | 5  | 0.39 | (0.09 ,1.69)  | 0.21 | 22  | 24  | 0.54 | (0.22 ,1.37) | 0.20        |
| >2.17                                  | 18 | 6  | 0.65 | (0.15 ,2.77)  | 0.56 | 23  | 23  | 0.38 | (0.15 ,0.97) | <b>0.04</b> |
| <i>p value for effect modification</i> |    |    |      |               | 0.61 |     |     |      |              |             |
| continuous                             | 83 | 31 | 0.56 | (0.23 ,1.35)  | 0.19 | 91  | 114 | 0.48 | (0.28 ,0.83) | <b>0.01</b> |

|                                                      |    |      |      |               |      |     |     |      |              |             |  |
|------------------------------------------------------|----|------|------|---------------|------|-----|-----|------|--------------|-------------|--|
| <i>p value for effect modification</i>               |    | 0.53 |      |               |      |     |     |      |              |             |  |
| <b>E2 (pmol/L)</b>                                   |    |      |      |               |      |     |     |      |              |             |  |
| <73.33                                               | 22 | 9    |      |               |      | 27  | 29  |      |              |             |  |
| 73.33-<90.44                                         | 23 | 5    | 0.53 | (0.12 ,2.32)  | 0.40 | 23  | 31  | 1.73 | (0.72 ,4.17) | 0.22        |  |
| 90.44-<112.73                                        | 25 | 15   | 1.87 | (0.51 ,6.82)  | 0.34 | 23  | 43  | 2.36 | (1.01 ,5.51) | <b>0.05</b> |  |
| >112.73                                              | 20 | 4    | 0.42 | (0.07 ,2.55)  | 0.35 | 28  | 23  | 0.87 | (0.37 ,2.08) | 0.76        |  |
| <i>p value for effect modification</i>               |    | 0.62 |      |               |      |     |     |      |              |             |  |
| continuous                                           | 90 | 33   | 1.02 | (0.27 ,3.76)  | 0.98 | 101 | 126 | 0.74 | (0.37 ,1.49) | 0.40        |  |
| <i>p value for effect modification</i>               |    | 0.71 |      |               |      |     |     |      |              |             |  |
| <b>SHBG (nmol/L)</b>                                 |    |      |      |               |      |     |     |      |              |             |  |
| <19.22                                               | 32 | 14   |      |               |      | 16  | 17  |      |              |             |  |
| 19.22-<31.53                                         | 20 | 9    | 1.44 | (0.38 ,5.47)  | 0.59 | 25  | 47  | 1.58 | (0.61 ,4.11) | 0.35        |  |
| 31.53-<44.53                                         | 18 | 2    | 0.31 | (0.05 ,1.94)  | 0.21 | 30  | 33  | 0.89 | (0.32 ,2.44) | 0.82        |  |
| >44.53                                               | 20 | 7    | 0.85 | (0.21 ,3.42)  | 0.82 | 30  | 29  | 0.74 | (0.27 ,2.02) | 0.56        |  |
| <i>p value for effect modification</i>               |    | 0.52 |      |               |      |     |     |      |              |             |  |
| continuous                                           | 90 | 32   | 0.76 | (0.24 ,2.37)  | 0.63 | 101 | 126 | 0.81 | (0.49 ,1.37) | 0.44        |  |
| <i>p value for effect modification</i>               |    | 0.74 |      |               |      |     |     |      |              |             |  |
| <b>Parent Estrogens (pmol/L)</b>                     |    |      |      |               |      |     |     |      |              |             |  |
| <175.89                                              | 27 | 9    |      |               |      | 20  | 26  |      |              |             |  |
| 175.89-<220.52                                       | 20 | 11   | 1.56 | (0.42 ,5.85)  | 0.51 | 31  | 41  | 0.95 | (0.41 ,2.21) | 0.91        |  |
| 220.52-<280.81                                       | 26 | 11   | 1.92 | (0.48 ,7.71)  | 0.36 | 18  | 38  | 2.05 | (0.82 ,5.12) | 0.13        |  |
| >280.81                                              | 17 | 2    | 0.21 | (0.02 ,1.79)  | 0.15 | 32  | 21  | 0.42 | (0.17 ,1.07) | 0.07        |  |
| <i>p value for effect modification</i>               |    | 0.62 |      |               |      |     |     |      |              |             |  |
| continuous                                           | 90 | 33   | 0.77 | (0.20 ,2.91)  | 0.70 | 101 | 126 | 0.48 | (0.23 ,1.00) | <b>0.05</b> |  |
| <i>p value for effect modification</i>               |    | 0.54 |      |               |      |     |     |      |              |             |  |
| <b>Testosterone: Parent Estrogens Ratio (pmol/L)</b> |    |      |      |               |      |     |     |      |              |             |  |
| <46.71                                               | 17 | 5    |      |               |      | 32  | 23  |      |              |             |  |
| 46.71-<69.53                                         | 19 | 8    | 1.87 | (0.34 ,10.40) | 0.48 | 29  | 53  | 2.70 | (1.17 ,6.24) | <b>0.02</b> |  |
| 69.53-<89.55                                         | 22 | 8    | 2.20 | (0.41 ,11.80) | 0.36 | 26  | 35  | 2.23 | (0.89 ,5.62) | 0.09        |  |
| >89.55                                               | 32 | 12   | 2.09 | (0.39 ,11.32) | 0.39 | 14  | 14  | 1.84 | (0.61 ,5.52) | 0.28        |  |
| <i>p value for effect modification</i>               |    | 0.84 |      |               |      |     |     |      |              |             |  |
| continuous                                           | 90 | 33   | 1.15 | (0.46 ,2.86)  | 0.77 | 101 | 125 | 1.70 | (0.74 ,3.93) | 0.21        |  |
| <i>p value for effect modification</i>               |    | 0.49 |      |               |      |     |     |      |              |             |  |

**Androstenedione: E1 Ratio (pmol/L)**

|                                        |    |    |      |              |      |             |     |      |              |      |
|----------------------------------------|----|----|------|--------------|------|-------------|-----|------|--------------|------|
| <17.81                                 | 12 | 7  |      |              |      | 39          | 44  |      |              |      |
| 17.81-<22.84                           | 19 | 6  | 1.40 | (0.25 ,7.92) | 0.70 | 28          | 35  | 0.69 | (0.32 ,1.47) | 0.33 |
| 22.84-<30.43                           | 26 | 6  | 0.53 | (0.10 ,2.90) | 0.46 | 22          | 27  | 0.83 | (0.37 ,1.89) | 0.66 |
| >30.43                                 | 33 | 14 | 0.92 | (0.18 ,4.68) | 0.92 | 12          | 20  | 1.37 | (0.53 ,3.55) | 0.52 |
| <i>p value for effect modification</i> |    |    |      |              |      | <i>0.48</i> |     |      |              |      |
| continuous                             | 90 | 33 | 0.52 | (0.19 ,1.42) | 0.20 | 101         | 126 | 1.35 | (0.67 ,2.70) | 0.40 |
| <i>p value for effect modification</i> |    |    |      |              |      | <i>0.09</i> |     |      |              |      |

**Testosterone: E2 Ratio (pmol/L)**

|                                        |    |    |      |              |      |             |     |      |              |             |
|----------------------------------------|----|----|------|--------------|------|-------------|-----|------|--------------|-------------|
| <119.31                                | 16 | 6  |      |              |      | 34          | 24  |      |              |             |
| 119.31-<160.81                         | 20 | 9  | 1.16 | (0.25 ,5.37) | 0.85 | 27          | 50  | 2.55 | (1.13 ,5.77) | <b>0.02</b> |
| 160.81-<205.73                         | 27 | 6  | 0.73 | (0.14 ,3.64) | 0.70 | 21          | 30  | 1.88 | (0.76 ,4.66) | 0.17        |
| >205.73                                | 27 | 12 | 1.28 | (0.27 ,6.09) | 0.76 | 19          | 21  | 1.79 | (0.67 ,4.78) | 0.24        |
| <i>p value for effect modification</i> |    |    |      |              |      | <i>0.42</i> |     |      |              |             |
| continuous                             | 90 | 33 | 1.08 | (0.37 ,3.09) | 0.89 | 101         | 125 | 1.15 | (0.50 ,2.69) | 0.74        |
| <i>p value for effect modification</i> |    |    |      |              |      | <i>0.72</i> |     |      |              |             |

**Free Testosterone (nmol/L)**

|                                        |    |    |       |                |      |             |     |      |              |      |
|----------------------------------------|----|----|-------|----------------|------|-------------|-----|------|--------------|------|
| <0.24                                  | 11 | 1  |       |                |      | 37          | 38  |      |              |      |
| 0.24-<0.29                             | 18 | 6  | 8.91  | (0.71 ,112.16) | 0.09 | 32          | 29  | 1.04 | (0.49 ,2.22) | 0.91 |
| 0.29-<0.38                             | 25 | 7  | 3.85  | (0.29 ,50.60)  | 0.31 | 25          | 41  | 1.84 | (0.84 ,4.01) | 0.13 |
| >0.38                                  | 36 | 18 | 10.07 | (0.85 ,119.27) | 0.07 | 7           | 17  | 2.49 | (0.81 ,7.63) | 0.11 |
| <i>p value for effect modification</i> |    |    |       |                |      | <i>0.48</i> |     |      |              |      |
| continuous                             | 90 | 32 | 1.73  | (0.62 ,4.82)   | 0.29 | 101         | 125 | 2.00 | (0.81 ,4.93) | 0.13 |
| <i>p value for effect modification</i> |    |    |       |                |      | <i>0.48</i> |     |      |              |      |

**Free DHT (pmol/L)**

|                                        |    |    |      |               |      |             |     |      |              |      |
|----------------------------------------|----|----|------|---------------|------|-------------|-----|------|--------------|------|
| <21.21                                 | 14 | 3  |      |               |      | 35          | 36  |      |              |      |
| 21.21-<27.13                           | 16 | 3  | 0.98 | (0.13 ,7.36)  | 0.98 | 32          | 34  | 1.26 | (0.59 ,2.66) | 0.55 |
| 27.13-<35.44                           | 25 | 7  | 1.19 | (0.20 ,6.96)  | 0.85 | 23          | 30  | 1.57 | (0.68 ,3.62) | 0.29 |
| >35.44                                 | 35 | 19 | 3.65 | (0.66 ,20.15) | 0.14 | 11          | 25  | 2.47 | (0.93 ,6.55) | 0.07 |
| <i>p value for effect modification</i> |    |    |      |               |      | <i>0.94</i> |     |      |              |      |
| continuous                             | 90 | 32 | 1.55 | (0.67 ,3.61)  | 0.31 | 101         | 125 | 1.89 | (0.89 ,4.00) | 0.10 |
| <i>p value for effect modification</i> |    |    |      |               |      | <i>0.30</i> |     |      |              |      |

**Free Estradiol (pmol/L)**

|                                        |    |    |      |              |      |      |     |      |              |      |
|----------------------------------------|----|----|------|--------------|------|------|-----|------|--------------|------|
| <1.96                                  | 21 | 8  |      |              |      | 28   | 32  |      |              |      |
| 1.96-<2.42                             | 22 | 6  | 0.57 | (0.12 ,2.77) | 0.48 | 27   | 40  | 1.52 | (0.69 ,3.35) | 0.30 |
| 2.42-<3.09                             | 24 | 11 | 1.42 | (0.38 ,5.31) | 0.60 | 24   | 34  | 1.59 | (0.69 ,3.66) | 0.28 |
| >3.09                                  | 23 | 7  | 0.60 | (0.13 ,2.79) | 0.51 | 22   | 20  | 0.87 | (0.35 ,2.20) | 0.77 |
| <i>p value for effect modification</i> |    |    |      |              |      | 0.92 |     |      |              |      |
| continuous                             | 90 | 32 | 1.28 | (0.39 ,4.21) | 0.69 | 101  | 126 | 0.79 | (0.37 ,1.71) | 0.55 |
| <i>p value for effect modification</i> |    |    |      |              |      | 0.47 |     |      |              |      |

Adjusted for smoking status, alcohol consumption, heartburn, regurgitation, gastroesophageal symptom score (excluding heartburn and regurgitation), BMI, and race. Continuous sex steroid hormone values were standardized to half of the difference between the 75th and 25th centiles of the distribution.

**Supplemental Table 3. Multivariable analysis of the associations between sex steroid hormones, SHBG and Barrett's esophagus stratified by body mass index**

| Variable                               | BMI <27.62 |       |      |               |             | BMI ≥27.62 |       |      |              |         |
|----------------------------------------|------------|-------|------|---------------|-------------|------------|-------|------|--------------|---------|
|                                        | Controls   | Cases | OR   | 95% CI        | p value     | Controls   | Cases | OR   | 95% CI       | p value |
| <b>DHEA (nmol/L)</b>                   |            |       |      |               |             |            |       |      |              |         |
| <5.90                                  | 23         | 24    |      |               |             | 28         | 46    |      |              |         |
| 5.90-<9.20                             | 17         | 18    | 0.89 | (0.25 ,3.16)  | 0.86        | 28         | 30    | 0.93 | (0.40 ,2.15) | 0.87    |
| 9.20-<11.85                            | 22         | 7     | 0.92 | (0.22 ,3.93)  | 0.91        | 25         | 11    | 0.35 | (0.12 ,1.02) | 0.05    |
| >11.85                                 | 28         | 10    | 1.58 | (0.37 ,6.79)  | 0.54        | 21         | 13    | 0.72 | (0.23 ,2.24) | 0.57    |
| <i>p value for effect modification</i> |            |       |      |               | 0.72        |            |       |      |              |         |
| continuous                             | 90         | 59    | 0.92 | (0.42 ,2.03)  | 0.83        | 102        | 100   | 0.62 | (0.32 ,1.19) | 0.15    |
| <i>p value for effect modification</i> |            |       |      |               | 0.74        |            |       |      |              |         |
| <b>DHEAS (umol/L)</b>                  |            |       |      |               |             |            |       |      |              |         |
| <2.25                                  | 21         | 27    |      |               |             | 24         | 40    |      |              |         |
| 2.25-<3.32                             | 18         | 12    | 1.73 | (0.40 ,7.43)  | 0.46        | 29         | 20    | 0.58 | (0.23 ,1.47) | 0.25    |
| 3.32-<4.72                             | 20         | 8     | 0.89 | (0.19 ,4.15)  | 0.88        | 23         | 15    | 0.72 | (0.26 ,2.01) | 0.53    |
| >4.72                                  | 22         | 8     | 2.92 | (0.52 ,16.49) | 0.22        | 21         | 13    | 0.77 | (0.24 ,2.42) | 0.65    |
| <i>p value for effect modification</i> |            |       |      |               | 0.57        |            |       |      |              |         |
| continuous                             | 81         | 55    | 2.22 | (0.92 ,5.36)  | 0.08        | 97         | 88    | 0.75 | (0.35 ,1.61) | 0.46    |
| <i>p value for effect modification</i> |            |       |      |               | 0.62        |            |       |      |              |         |
| <b>Androstenediol (pmol/L)</b>         |            |       |      |               |             |            |       |      |              |         |
| <1715.26                               | 18         | 17    |      |               |             | 32         | 36    |      |              |         |
| 1715.26-<2323.60                       | 20         | 14    | 1.46 | (0.32 ,6.67)  | 0.63        | 28         | 31    | 1.26 | (0.54 ,2.93) | 0.60    |
| 2323.60-<3162.90                       | 29         | 12    | 0.56 | (0.14 ,2.16)  | 0.40        | 19         | 18    | 1.25 | (0.47 ,3.33) | 0.65    |
| >3162.90                               | 23         | 15    | 2.63 | (0.65 ,10.64) | 0.17        | 23         | 14    | 0.94 | (0.33 ,2.69) | 0.91    |
| <i>p value for effect modification</i> |            |       |      |               | 0.35        |            |       |      |              |         |
| continuous                             | 90         | 58    | 1.50 | (0.68 ,3.34)  | 0.32        | 102        | 99    | 0.82 | (0.38 ,1.77) | 0.62    |
| <i>p value for effect modification</i> |            |       |      |               | 0.58        |            |       |      |              |         |
| <b>Androstenedione (nmol/L)</b>        |            |       |      |               |             |            |       |      |              |         |
| <2.32                                  | 15         | 19    |      |               |             | 33         | 33    |      |              |         |
| 2.32-<2.83                             | 25         | 16    | 0.23 | (0.06 ,0.88)  | <b>0.03</b> | 24         | 20    | 1.02 | (0.40 ,2.59) | 0.96    |
| 2.83-<3.87                             | 29         | 17    | 0.33 | (0.09 ,1.29)  | 0.11        | 18         | 27    | 1.52 | (0.57 ,4.08) | 0.41    |
| >3.87                                  | 21         | 7     | 0.29 | (0.06 ,1.30)  | 0.10        | 27         | 20    | 0.90 | (0.36 ,2.27) | 0.83    |



|                                        |    |    |      |               |      |      |     |      |              |             |  |
|----------------------------------------|----|----|------|---------------|------|------|-----|------|--------------|-------------|--|
| <i>p value for effect modification</i> |    |    |      |               |      | 0.24 |     |      |              |             |  |
| continuous                             | 90 | 59 | 1.27 | (0.62 ,2.61)  | 0.51 | 102  | 100 | 0.79 | (0.37 ,1.66) | 0.53        |  |
| <i>p value for effect modification</i> |    |    |      |               |      | 0.76 |     |      |              |             |  |
| <b>Testosterone (nmol/L)</b>           |    |    |      |               |      |      |     |      |              |             |  |
| <10.72                                 | 11 | 10 |      |               |      | 37   | 24  |      |              |             |  |
| 10.72-<14.14                           | 24 | 16 | 0.60 | (0.13 ,2.84)  | 0.52 | 26   | 28  | 1.66 | (0.67 ,4.11) | 0.28        |  |
| 14.14-<18.31                           | 25 | 15 | 0.66 | (0.15 ,2.95)  | 0.59 | 21   | 27  | 3.54 | (1.31 ,9.58) | <b>0.01</b> |  |
| >18.31                                 | 30 | 18 | 0.79 | (0.18 ,3.39)  | 0.75 | 18   | 20  | 2.95 | (1.03 ,8.49) | <b>0.04</b> |  |
| <i>p value for effect modification</i> |    |    |      |               |      | 0.27 |     |      |              |             |  |
| continuous                             | 90 | 59 | 0.89 | (0.31 ,2.51)  | 0.82 | 102  | 99  | 1.57 | (0.68 ,3.59) | 0.29        |  |
| <i>p value for effect modification</i> |    |    |      |               |      | 0.34 |     |      |              |             |  |
| <b>DHT (pmol/L)</b>                    |    |    |      |               |      |      |     |      |              |             |  |
| <767.38                                | 9  | 11 |      |               |      | 39   | 27  |      |              |             |  |
| 767.38-<1107.03                        | 21 | 10 | 0.39 | (0.07 ,2.07)  | 0.27 | 26   | 28  | 1.64 | (0.68 ,3.97) | 0.27        |  |
| 1107.03-<1559.02                       | 26 | 23 | 0.66 | (0.15 ,3.00)  | 0.59 | 23   | 28  | 1.97 | (0.80 ,4.89) | 0.14        |  |
| >1559.02                               | 34 | 15 | 0.34 | (0.07 ,1.54)  | 0.16 | 14   | 17  | 1.71 | (0.59 ,4.92) | 0.32        |  |
| <i>p value for effect modification</i> |    |    |      |               |      | 0.52 |     |      |              |             |  |
| continuous                             | 90 | 59 | 0.75 | (0.30 ,1.85)  | 0.53 | 102  | 100 | 1.29 | (0.65 ,2.53) | 0.47        |  |
| <i>p value for effect modification</i> |    |    |      |               |      | 0.56 |     |      |              |             |  |
| <b>3adiol3g (nmol/L)</b>               |    |    |      |               |      |      |     |      |              |             |  |
| <2.42                                  | 19 | 14 |      |               |      | 28   | 33  |      |              |             |  |
| 2.42-<3.31                             | 23 | 9  | 0.72 | (0.16 ,3.27)  | 0.67 | 26   | 18  | 0.92 | (0.36 ,2.38) | 0.87        |  |
| 3.31-<4.96                             | 22 | 16 | 1.73 | (0.36 ,8.16)  | 0.49 | 22   | 27  | 1.06 | (0.42 ,2.67) | 0.90        |  |
| >4.96                                  | 24 | 18 | 3.72 | (0.90 ,15.41) | 0.07 | 25   | 20  | 0.97 | (0.37 ,2.58) | 0.96        |  |
| <i>p value for effect modification</i> |    |    |      |               |      | 0.75 |     |      |              |             |  |
| continuous                             | 88 | 57 | 1.32 | (0.81 ,2.16)  | 0.26 | 101  | 98  | 0.93 | (0.66 ,1.31) | 0.67        |  |
| <i>p value for effect modification</i> |    |    |      |               |      | 0.56 |     |      |              |             |  |
| <b>3adiol17g (nmol/L)</b>              |    |    |      |               |      |      |     |      |              |             |  |
| <6.00                                  | 24 | 23 |      |               |      | 24   | 21  |      |              |             |  |
| 6.00-<8.65                             | 24 | 9  | 0.89 | (0.24 ,3.34)  | 0.87 | 22   | 21  | 1.25 | (0.44 ,3.52) | 0.67        |  |
| 8.65-<12.36                            | 24 | 13 | 1.48 | (0.44 ,4.97)  | 0.52 | 24   | 32  | 1.95 | (0.75 ,5.08) | 0.17        |  |
| >12.36                                 | 16 | 10 | 1.11 | (0.28 ,4.43)  | 0.89 | 31   | 22  | 1.34 | (0.48 ,3.75) | 0.57        |  |
| <i>p value for effect modification</i> |    |    |      |               |      | 0.73 |     |      |              |             |  |

|                                        |    |    |      |               |             |     |     |      |              |              |
|----------------------------------------|----|----|------|---------------|-------------|-----|-----|------|--------------|--------------|
| continuous                             | 88 | 55 | 1.24 | (0.57 ,2.70)  | 0.58        | 101 | 96  | 0.91 | (0.64 ,1.29) | 0.61         |
| <i>p value for effect modification</i> |    |    |      |               | <i>0.61</i> |     |     |      |              |              |
| <b>ADT (pmol/L)</b>                    |    |    |      |               |             |     |     |      |              |              |
| <617.13                                | 21 | 20 |      |               |             | 27  | 57  |      |              |              |
| 617.13-<803.65                         | 20 | 16 | 1.47 | (0.35 ,6.21)  | 0.60        | 30  | 17  | 0.23 | (0.08 ,0.63) | <b>0.004</b> |
| 803.65-<1031.64                        | 26 | 12 | 1.38 | (0.35 ,5.36)  | 0.64        | 22  | 16  | 0.43 | (0.16 ,1.15) | 0.09         |
| >1031.64                               | 23 | 11 | 3.36 | (0.71 ,15.89) | 0.13        | 23  | 10  | 0.21 | (0.07 ,0.66) | <b>0.01</b>  |
| <i>p value for effect modification</i> |    |    |      |               | <i>0.11</i> |     |     |      |              |              |
| continuous                             | 90 | 59 | 1.63 | (0.67 ,3.95)  | 0.28        | 102 | 100 | 0.65 | (0.33 ,1.28) | 0.21         |
| <i>p value for effect modification</i> |    |    |      |               | <i>0.30</i> |     |     |      |              |              |
| <b>ADT-G (nmol/L)</b>                  |    |    |      |               |             |     |     |      |              |              |
| <56.45                                 | 15 | 14 |      |               |             | 30  | 40  |      |              |              |
| 56.45-<78.02                           | 23 | 16 | 1.07 | (0.26 ,4.38)  | 0.92        | 27  | 20  | 0.80 | (0.32 ,1.99) | 0.63         |
| 78.02-<118.98                          | 24 | 11 | 1.08 | (0.23 ,4.92)  | 0.93        | 24  | 24  | 1.74 | (0.67 ,4.56) | 0.26         |
| >118.98                                | 25 | 17 | 2.14 | (0.53 ,8.55)  | 0.28        | 20  | 13  | 0.51 | (0.18 ,1.49) | 0.22         |
| <i>p value for effect modification</i> |    |    |      |               | <i>0.19</i> |     |     |      |              |              |
| continuous                             | 87 | 58 | 1.44 | (0.76 ,2.75)  | 0.26        | 101 | 97  | 0.76 | (0.47 ,1.22) | 0.25         |
| <i>p value for effect modification</i> |    |    |      |               | <i>0.26</i> |     |     |      |              |              |
| <b>E1 (pmol/L)</b>                     |    |    |      |               |             |     |     |      |              |              |
| <97.50                                 | 26 | 16 |      |               |             | 22  | 20  |      |              |              |
| 97.50-<127.97                          | 24 | 17 | 0.74 | (0.21 ,2.62)  | 0.64        | 23  | 31  | 1.42 | (0.53 ,3.80) | 0.48         |
| 127.97-<161.59                         | 23 | 20 | 1.31 | (0.35 ,4.91)  | 0.69        | 24  | 27  | 1.37 | (0.52 ,3.65) | 0.52         |
| >161.59                                | 17 | 6  | 0.33 | (0.07 ,1.55)  | 0.16        | 33  | 22  | 0.68 | (0.26 ,1.78) | 0.43         |
| <i>p value for effect modification</i> |    |    |      |               | <i>0.71</i> |     |     |      |              |              |
| continuous                             | 90 | 59 | 0.64 | (0.22 ,1.85)  | 0.41        | 102 | 100 | 0.48 | (0.22 ,1.01) | 0.05         |
| <i>p value for effect modification</i> |    |    |      |               | <i>0.51</i> |     |     |      |              |              |
| <b>E1S (nmol/L)</b>                    |    |    |      |               |             |     |     |      |              |              |
| <0.92                                  | 24 | 20 |      |               |             | 20  | 34  |      |              |              |
| 0.92-<1.49                             | 19 | 16 | 0.80 | (0.22 ,2.87)  | 0.73        | 23  | 17  | 0.42 | (0.16 ,1.13) | 0.08         |
| 1.49-<2.17                             | 21 | 12 | 0.80 | (0.19 ,3.31)  | 0.76        | 25  | 17  | 0.51 | (0.19 ,1.39) | 0.19         |
| >2.17                                  | 16 | 7  | 0.31 | (0.06 ,1.49)  | 0.14        | 27  | 22  | 0.50 | (0.20 ,1.28) | 0.15         |
| <i>p value for effect modification</i> |    |    |      |               | <i>0.48</i> |     |     |      |              |              |
| continuous                             | 80 | 55 | 0.47 | (0.21 ,1.07)  | 0.07        | 95  | 90  | 0.64 | (0.36 ,1.14) | 0.13         |

|                                                      |    |    |      |               |             |     |     |      |              |      |
|------------------------------------------------------|----|----|------|---------------|-------------|-----|-----|------|--------------|------|
| <i>p value for effect modification</i>               |    |    |      | <i>1.00</i>   |             |     |     |      |              |      |
| <b>E2 (pmol/L)</b>                                   |    |    |      |               |             |     |     |      |              |      |
| <73.33                                               | 28 | 17 |      |               |             | 19  | 21  |      |              |      |
| 73.33-<90.44                                         | 21 | 12 | 0.63 | (0.17 ,2.32)  | 0.49        | 26  | 24  | 0.99 | (0.37 ,2.64) | 0.98 |
| 90.44-<112.73                                        | 23 | 21 | 1.29 | (0.38 ,4.42)  | 0.69        | 27  | 37  | 1.86 | (0.72 ,4.82) | 0.20 |
| >112.73                                              | 18 | 9  | 0.67 | (0.16 ,2.78)  | 0.58        | 30  | 18  | 0.69 | (0.25 ,1.90) | 0.47 |
| <i>p value for effect modification</i>               |    |    |      | <i>0.99</i>   |             |     |     |      |              |      |
| continuous                                           | 90 | 59 | 0.66 | (0.19 ,2.29)  | 0.52        | 102 | 100 | 0.85 | (0.41 ,1.76) | 0.66 |
| <i>p value for effect modification</i>               |    |    |      | <i>0.91</i>   |             |     |     |      |              |      |
| <b>SHBG (nmol/L)</b>                                 |    |    |      |               |             |     |     |      |              |      |
| <19.22                                               | 11 | 5  |      |               |             | 38  | 26  |      |              |      |
| 19.22-<31.53                                         | 21 | 18 | 0.76 | (0.14 ,3.99)  | 0.74        | 28  | 38  | 1.31 | (0.54 ,3.21) | 0.55 |
| 31.53-<44.53                                         | 27 | 17 | 0.33 | (0.06 ,1.78)  | 0.20        | 18  | 18  | 1.01 | (0.36 ,2.87) | 0.98 |
| >44.53                                               | 31 | 18 | 0.25 | (0.05 ,1.21)  | 0.09        | 18  | 18  | 0.76 | (0.27 ,2.14) | 0.61 |
| <i>p value for effect modification</i>               |    |    |      | <i>0.99</i>   |             |     |     |      |              |      |
| continuous                                           | 90 | 58 | 0.40 | (0.17 ,0.95)  | <b>0.04</b> | 102 | 100 | 0.94 | (0.47 ,1.90) | 0.87 |
| <i>p value for effect modification</i>               |    |    |      | <i>0.44</i>   |             |     |     |      |              |      |
| <b>Parent Estrogens (pmol/L)</b>                     |    |    |      |               |             |     |     |      |              |      |
| <175.89                                              | 26 | 15 |      |               |             | 21  | 20  |      |              |      |
| 175.89-<220.52                                       | 24 | 20 | 1.15 | (0.34 ,3.88)  | 0.82        | 26  | 32  | 0.87 | (0.33 ,2.28) | 0.78 |
| 220.52-<280.81                                       | 23 | 19 | 1.20 | (0.33 ,4.44)  | 0.78        | 23  | 30  | 1.74 | (0.65 ,4.66) | 0.27 |
| >280.81                                              | 17 | 5  | 0.45 | (0.10 ,2.14)  | 0.32        | 32  | 18  | 0.47 | (0.17 ,1.29) | 0.14 |
| <i>p value for effect modification</i>               |    |    |      | <i>0.67</i>   |             |     |     |      |              |      |
| continuous                                           | 90 | 59 | 0.61 | (0.18 ,2.01)  | 0.42        | 102 | 100 | 0.56 | (0.25 ,1.23) | 0.15 |
| <i>p value for effect modification</i>               |    |    |      | <i>0.73</i>   |             |     |     |      |              |      |
| <b>Testosterone: Parent Estrogens Ratio (pmol/L)</b> |    |    |      |               |             |     |     |      |              |      |
| <46.71                                               | 13 | 5  |      |               |             | 36  | 23  |      |              |      |
| 46.71-<69.53                                         | 19 | 21 | 5.62 | (1.04 ,30.37) | <b>0.05</b> | 31  | 40  | 2.08 | (0.88 ,4.93) | 0.10 |
| 69.53-<89.55                                         | 26 | 18 | 2.05 | (0.41 ,10.19) | 0.38        | 22  | 25  | 2.38 | (0.90 ,6.29) | 0.08 |
| >89.55                                               | 32 | 15 | 2.64 | (0.53 ,13.23) | 0.24        | 13  | 11  | 2.07 | (0.61 ,7.06) | 0.25 |
| <i>p value for effect modification</i>               |    |    |      | <i>0.45</i>   |             |     |     |      |              |      |
| continuous                                           | 90 | 59 | 1.51 | (0.57 ,4.00)  | 0.40        | 102 | 99  | 2.30 | (0.92 ,5.78) | 0.08 |
| <i>p value for effect modification</i>               |    |    |      | <i>0.21</i>   |             |     |     |      |              |      |

**Androstenedione: E1 Ratio (pmol/L)**

|                                        |    |    |      |               |      |     |     |      |              |             |
|----------------------------------------|----|----|------|---------------|------|-----|-----|------|--------------|-------------|
| <17.81                                 | 15 | 15 |      |               |      | 36  | 36  |      |              |             |
| 17.81-<22.84                           | 23 | 16 | 0.82 | (0.23 ,2.94)  | 0.76 | 23  | 25  | 0.73 | (0.29 ,1.83) | 0.50        |
| 22.84-<30.43                           | 26 | 14 | 0.44 | (0.12 ,1.68)  | 0.23 | 24  | 19  | 0.99 | (0.38 ,2.54) | 0.98        |
| >30.43                                 | 26 | 14 | 2.89 | (0.67 ,12.48) | 0.15 | 19  | 20  | 1.30 | (0.49 ,3.48) | 0.60        |
| <i>p value for effect modification</i> |    |    |      |               |      |     |     |      |              | <i>0.85</i> |
| continuous                             | 90 | 59 | 1.60 | (0.60 ,4.29)  | 0.35 | 102 | 100 | 1.28 | (0.60 ,2.74) | 0.53        |
| <i>p value for effect modification</i> |    |    |      |               |      |     |     |      |              | <i>0.55</i> |

**Testosterone: E2 Ratio (pmol/L)**

|                                        |    |    |      |              |      |     |    |      |              |             |
|----------------------------------------|----|----|------|--------------|------|-----|----|------|--------------|-------------|
| <119.31                                | 12 | 8  |      |              |      | 38  | 22 |      |              |             |
| 119.31-<160.81                         | 18 | 17 | 0.57 | (0.12 ,2.61) | 0.47 | 30  | 42 | 2.24 | (0.97 ,5.20) | 0.06        |
| 160.81-<205.73                         | 28 | 13 | 0.44 | (0.11 ,1.80) | 0.25 | 21  | 23 | 2.08 | (0.78 ,5.54) | 0.14        |
| >205.73                                | 32 | 21 | 1.08 | (0.29 ,4.02) | 0.90 | 13  | 12 | 2.08 | (0.66 ,6.55) | 0.21        |
| <i>p value for effect modification</i> |    |    |      |              |      |     |    |      |              | <i>0.51</i> |
| continuous                             | 90 | 59 | 1.26 | (0.45 ,3.51) | 0.65 | 102 | 99 | 1.78 | (0.68 ,4.64) | 0.24        |
| <i>p value for effect modification</i> |    |    |      |              |      |     |    |      |              | <i>0.32</i> |

**Free Testosterone (nmol/L)**

|                                        |    |    |      |               |             |     |    |      |               |             |
|----------------------------------------|----|----|------|---------------|-------------|-----|----|------|---------------|-------------|
| <0.24                                  | 19 | 13 |      |               |             | 27  | 26 |      |               |             |
| 0.24-<0.29                             | 21 | 14 | 2.13 | (0.49 ,9.30)  | 0.32        | 29  | 21 | 1.24 | (0.47 ,3.25)  | 0.66        |
| 0.29-<0.38                             | 25 | 18 | 5.30 | (1.25 ,22.48) | <b>0.02</b> | 25  | 30 | 2.01 | (0.75 ,5.37)  | 0.16        |
| >0.38                                  | 25 | 13 | 4.37 | (0.90 ,21.17) | 0.07        | 21  | 22 | 5.81 | (1.67 ,20.21) | <b>0.01</b> |
| <i>p value for effect modification</i> |    |    |      |               |             |     |    |      |               | <i>0.34</i> |
| continuous                             | 90 | 58 | 2.81 | (0.83 ,9.48)  | 0.10        | 102 | 99 | 2.15 | (0.92 ,5.02)  | 0.08        |
| <i>p value for effect modification</i> |    |    |      |               |             |     |    |      |               | <i>0.83</i> |

**Free DHT (pmol/L)**

|                                        |    |    |      |               |      |     |    |      |               |             |
|----------------------------------------|----|----|------|---------------|------|-----|----|------|---------------|-------------|
| <21.21                                 | 15 | 13 |      |               |      | 31  | 26 |      |               |             |
| 21.21-<27.13                           | 23 | 9  | 0.95 | (0.22 ,4.21)  | 0.95 | 25  | 28 | 1.44 | (0.60 ,3.48)  | 0.41        |
| 27.13-<35.44                           | 22 | 20 | 4.41 | (0.99 ,19.74) | 0.05 | 27  | 17 | 1.20 | (0.45 ,3.25)  | 0.71        |
| >35.44                                 | 30 | 16 | 3.55 | (0.77 ,16.33) | 0.10 | 19  | 28 | 4.87 | (1.60 ,14.83) | <b>0.01</b> |
| <i>p value for effect modification</i> |    |    |      |               |      |     |    |      |               | <i>0.09</i> |
| continuous                             | 90 | 58 | 2.02 | (0.69 ,5.92)  | 0.20 | 102 | 99 | 1.62 | (0.82 ,3.21)  | 0.16        |
| <i>p value for effect modification</i> |    |    |      |               |      |     |    |      |               | <i>1.00</i> |

**Free Estradiol (pmol/L)**

|                                        |    |    |      |              |      |      |     |      |              |      |  |
|----------------------------------------|----|----|------|--------------|------|------|-----|------|--------------|------|--|
| <1.96                                  | 31 | 20 |      |              |      | 16   | 20  |      |              |      |  |
| 1.96-<2.42                             | 24 | 15 | 0.48 | (0.14 ,1.66) | 0.25 | 24   | 31  | 1.41 | (0.50 ,3.92) | 0.51 |  |
| 2.42-<3.09                             | 22 | 17 | 1.11 | (0.34 ,3.61) | 0.87 | 28   | 28  | 1.12 | (0.42 ,3.02) | 0.82 |  |
| >3.09                                  | 13 | 6  | 1.37 | (0.30 ,6.12) | 0.68 | 34   | 21  | 0.86 | (0.31 ,2.39) | 0.77 |  |
| <i>p value for effect modification</i> |    |    |      |              |      | 0.76 |     |      |              |      |  |
| continuous                             | 90 | 58 | 1.36 | (0.40 ,4.69) | 0.62 | 102  | 100 | 0.88 | (0.41 ,1.89) | 0.75 |  |
| <i>p value for effect modification</i> |    |    |      |              |      | 0.64 |     |      |              |      |  |

---

Adjusted for age, smoking status, alcohol consumption, heartburn, regurgitation, gastroesophageal symptom score (excluding heartburn and regurgitation), and race. Continuous sex steroid hormone values were standardized to half of the difference between the 75th and 25th centiles of the distribution.
